# Supplementary material for: HPV-16 E7 expression up-regulates phospholipase D activity and promotes rapamycin resistance in a pRB-dependent manner
Source: PubMed Central journal article supplement (PMC5923196; doi:10.1186/s12885-018-4392-8), 2018-04-27
Supplement: 12885_2018_4392_MOESM1_ESM.pdf [file 12885_2018_4392_MOESM1_ESM.pdf]

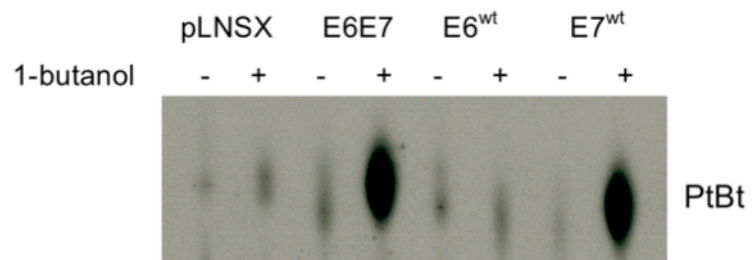

Figure S1. HPV-16 E6 did not affect PLD activity. Autoradiogram showing the result of Thin-Layer Chromatography where radioactive phospholipids were separated to monitor the generation of phosphatidyl butanol, an indicative of strong PLD activity.
