# Supplementary material for: HPV-16 E7 expression up-regulates phospholipase D activity and promotes rapamycin resistance in a pRB-dependent manner
Source: Springer Nature journal article supplement (doi:10.1186/s12885-018-4392-8), 2018-04-27
Supplement: MOESM2 [file 15725458]

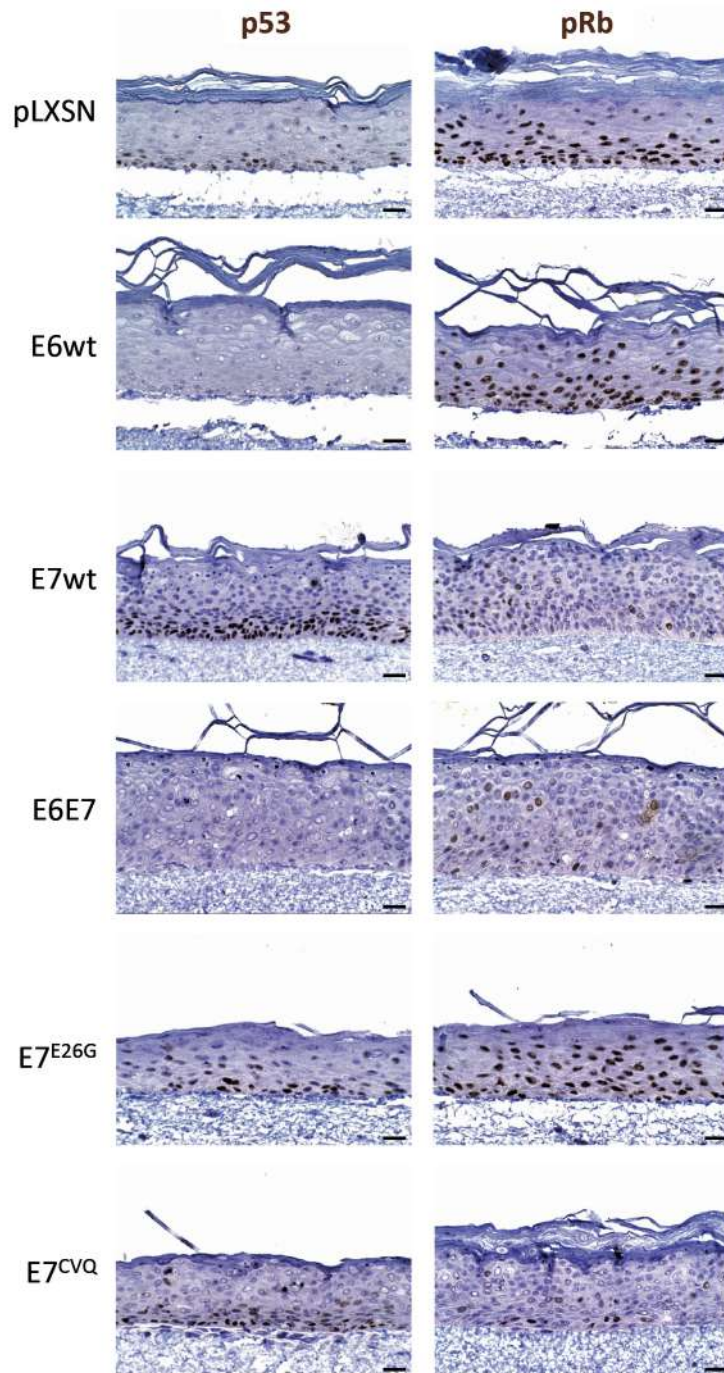

Fig. S2. E6 and E7 expression affect p53 and pRb expression in primary human keratinocytes. Immunohistochemistry indicating p53 and pRb staining in organotypic cultures of keratinocytes expressing HPV-16 WT genes and E7 mutants. Scale bars, 20 $\mu$ m.
